# Supplementary material
Source: Springer Nature journal article supplement (https://www.springermedizin.de/resource/supplementary/12885_2013_3913_MOESM1_ESM.pdf/9464742)

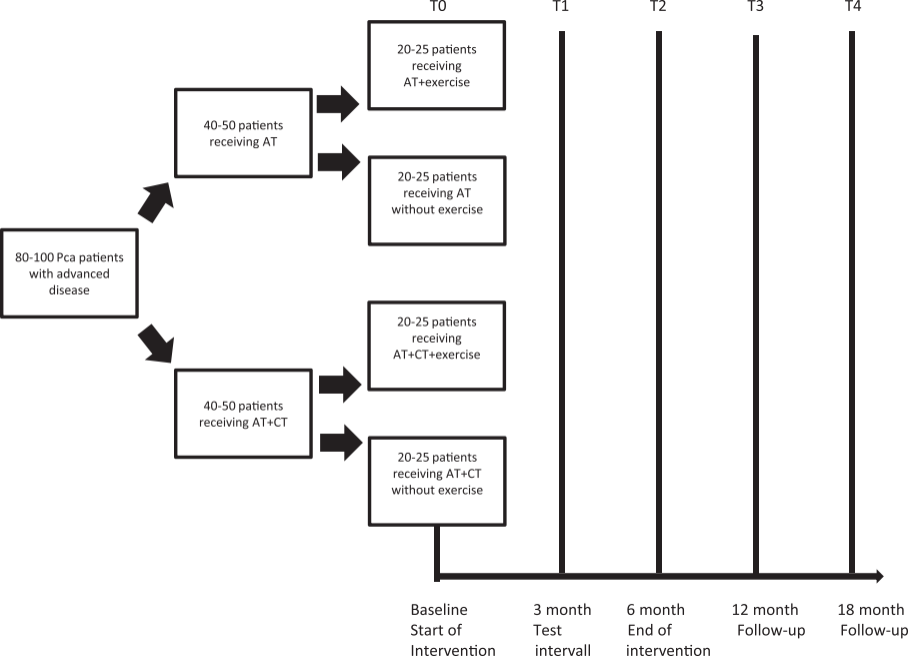

Supplement: MOESM1 [file 9464742]
